# Supplementary material for: Grade 2 disabilities in leprosy patients from Brazil: Need for follow-up after completion of multidrug therapy
Source: PubMed Central journal article supplement (PMC6062121; doi:10.1371/journal.pntd.0006645), 2018-07-16
Supplement: pntd.0006645.s001.pdf [file pntd.0006645.s001.pdf]

# S1 Appendix. Assessment of disability and nerve function.

| IntegraHans                                                                                                                                                                                                                                                                                                                                                                                                                                                                                     |                                                                                     |                                                                                  |   |                        |         |       |   |
|-------------------------------------------------------------------------------------------------------------------------------------------------------------------------------------------------------------------------------------------------------------------------------------------------------------------------------------------------------------------------------------------------------------------------------------------------------------------------------------------------|-------------------------------------------------------------------------------------|----------------------------------------------------------------------------------|---|------------------------|---------|-------|---|
| Patient (ID): _____                                                                                                                                                                                                                                                                                                                                                                                                                                                                             |                                                                                     |                                                                                  |   | SINAN number _____     |         |       |   |
| Examiner: _____                                                                                                                                                                                                                                                                                                                                                                                                                                                                                 |                                                                                     |                                                                                  |   | Collection date: _____ |         |       |   |
| Revisor: _____                                                                                                                                                                                                                                                                                                                                                                                                                                                                                  |                                                                                     |                                                                                  |   | Review date: _____     |         |       |   |
| ITEM                                                                                                                                                                                                                                                                                                                                                                                                                                                                                            | VARIABLE                                                                            | CODE                                                                             |   |                        | Revisor |       |   |
| 1.                                                                                                                                                                                                                                                                                                                                                                                                                                                                                              | Patient name                                                                        | _____                                                                            |   |                        |         |       |   |
| 2.                                                                                                                                                                                                                                                                                                                                                                                                                                                                                              | Date of birth                                                                       | ____ / ____ / ____                                                               |   |                        |         |       |   |
| 3.                                                                                                                                                                                                                                                                                                                                                                                                                                                                                              | Gender                                                                              | Male 1<br>Female 2                                                               |   |                        | ( )     |       |   |
| 4.                                                                                                                                                                                                                                                                                                                                                                                                                                                                                              | Current occupation                                                                  | _____                                                                            |   |                        |         |       |   |
| 5.                                                                                                                                                                                                                                                                                                                                                                                                                                                                                              | Operational classification                                                          | Paucibacillary 1<br>Multibacillary 2<br>Undefined 9                              |   |                        | ( )     |       |   |
| 6.                                                                                                                                                                                                                                                                                                                                                                                                                                                                                              | Start date of MDT                                                                   | ____ / ____ / ____                                                               |   |                        |         |       |   |
| 7.                                                                                                                                                                                                                                                                                                                                                                                                                                                                                              | Completion date of MDT                                                              | ____ / ____ / ____                                                               |   |                        |         |       |   |
| 8.                                                                                                                                                                                                                                                                                                                                                                                                                                                                                              | Clinical forms                                                                      | Indeterminate 1<br>Tuberculoid 2<br>Borderline 3<br>Lepromatous 4<br>Undefined 9 |   |                        | ( )     |       |   |
| FACE                                                                                                                                                                                                                                                                                                                                                                                                                                                                                            |                                                                                     | 1 / /                                                                            |   | 2 / /                  |         | 3 / / |   |
| Nose                                                                                                                                                                                                                                                                                                                                                                                                                                                                                            |                                                                                     | R                                                                                | L | R                      | L       | R     | L |
| Chief complaint                                                                                                                                                                                                                                                                                                                                                                                                                                                                                 |                                                                                     |                                                                                  |   |                        |         |       |   |
| Dry skin (Y/N)                                                                                                                                                                                                                                                                                                                                                                                                                                                                                  |                                                                                     |                                                                                  |   |                        |         |       |   |
| Wound (Y/N)                                                                                                                                                                                                                                                                                                                                                                                                                                                                                     |                                                                                     |                                                                                  |   |                        |         |       |   |
| Septal perforation (Y/N)                                                                                                                                                                                                                                                                                                                                                                                                                                                                        |                                                                                     |                                                                                  |   |                        |         |       |   |
| Eyes                                                                                                                                                                                                                                                                                                                                                                                                                                                                                            |                                                                                     | R                                                                                | L | R                      | L       | R     | L |
| Chief complaint                                                                                                                                                                                                                                                                                                                                                                                                                                                                                 |                                                                                     |                                                                                  |   |                        |         |       |   |
| Lagophthalmos mild (Y/N mm)                                                                                                                                                                                                                                                                                                                                                                                                                                                                     |                                                                                     |                                                                                  |   |                        |         |       |   |
| Lagophthalmos severe (Y/N mm)                                                                                                                                                                                                                                                                                                                                                                                                                                                                   |                                                                                     |                                                                                  |   |                        |         |       |   |
| Trichiasis (Y/N) / Ectropion (Y/N)                                                                                                                                                                                                                                                                                                                                                                                                                                                              |                                                                                     |                                                                                  |   |                        |         |       |   |
| Corneal hypoesthesia (Y/N)                                                                                                                                                                                                                                                                                                                                                                                                                                                                      |                                                                                     |                                                                                  |   |                        |         |       |   |
| Corneal opacity (Y/N)                                                                                                                                                                                                                                                                                                                                                                                                                                                                           |                                                                                     |                                                                                  |   |                        |         |       |   |
| Cataract (Y/N)                                                                                                                                                                                                                                                                                                                                                                                                                                                                                  |                                                                                     |                                                                                  |   |                        |         |       |   |
| Poor visual acuity (VA < 6/60)                                                                                                                                                                                                                                                                                                                                                                                                                                                                  |                                                                                     |                                                                                  |   |                        |         |       |   |
| <b>Note:</b> Y = Yes; N = No. If lagophthalmos (register in mm). For visual acuity: N/C = no correction; W/C = with correction                                                                                                                                                                                                                                                                                                                                                                  |                                                                                     |                                                                                  |   |                        |         |       |   |
| UPPER LIMBS                                                                                                                                                                                                                                                                                                                                                                                                                                                                                     |                                                                                     | 1 / /                                                                            |   | 2 / /                  |         | 3 / / |   |
| Chief complaint                                                                                                                                                                                                                                                                                                                                                                                                                                                                                 |                                                                                     |                                                                                  |   |                        |         |       |   |
| Nerve palpation                                                                                                                                                                                                                                                                                                                                                                                                                                                                                 |                                                                                     | R                                                                                | L | R                      | L       | R     | L |
| Ulnar                                                                                                                                                                                                                                                                                                                                                                                                                                                                                           |                                                                                     |                                                                                  |   |                        |         |       |   |
| Median                                                                                                                                                                                                                                                                                                                                                                                                                                                                                          |                                                                                     |                                                                                  |   |                        |         |       |   |
| Radial                                                                                                                                                                                                                                                                                                                                                                                                                                                                                          |                                                                                     |                                                                                  |   |                        |         |       |   |
| <b>Note:</b> N = Normal; TH = Thickened; TD = Tenderness                                                                                                                                                                                                                                                                                                                                                                                                                                        |                                                                                     |                                                                                  |   |                        |         |       |   |
| Voluntary muscle test                                                                                                                                                                                                                                                                                                                                                                                                                                                                           |                                                                                     | 1 / /                                                                            |   | 2 / /                  |         | 3 / / |   |
|                                                                                                                                                                                                                                                                                                                                                                                                                                                                                                 |                                                                                     | R                                                                                | L | R                      | L       | R     | L |
| Ulnar                                                                                                                                                                                                                                                                                                                                                                                                                                                                                           | 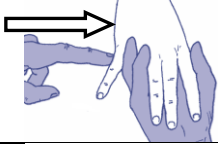 |                                                                                  |   |                        |         |       |   |
| Median                                                                                                                                                                                                                                                                                                                                                                                                                                                                                          |  |                                                                                  |   |                        |         |       |   |
| Radial                                                                                                                                                                                                                                                                                                                                                                                                                                                                                          |  |                                                                                  |   |                        |         |       |   |
| <b>Caption: Medical Research Council -</b> Grade 0 - No muscle activation; Grade 1 - Trace muscle activation, such as a twitch, without achieving full range of motion; Grade 2 - Muscle activation with gravity eliminated, achieving full range of motion; Grade 3 - Muscle activation against gravity, full range of motion; Grade 4 - Muscle activation against some resistance, full range of motion; Grade 5 - Muscle activation against examiner's full resistance, full range of motion |                                                                                     |                                                                                  |   |                        |         |       |   |

| Sensory testing |   |       |   |       |   |
|-----------------|---|-------|---|-------|---|
| 1 / /           |   | 2 / / |   | 3 / / |   |
| R               | L | R     | L | R     | L |
|                 |   |       |   |       |   |

**Caption:** Clawing: Mobile = M Rigid = R Wounds/ulcers: Reabsorption: Monofilaments: Standardized code

| LOWER LIMBS            | 1 / / |   | 2 / / |   | 3 / / |   |
|------------------------|-------|---|-------|---|-------|---|
| Chief complaint        |       |   |       |   |       |   |
| <b>Nerve palpation</b> | R     | L | R     | L | R     | L |
| Common fibular         |       |   |       |   |       |   |
| Posterior tibial       |       |   |       |   |       |   |

**Note:** N = Normal; TH = Thickened; TD = Tenderness

| Voluntary muscle test                          |  | 1 / / |   | 2 / / |   | 3 / / |   |
|------------------------------------------------|--|-------|---|-------|---|-------|---|
|                                                |  | R     | L | R     | L | R     | L |
| Hallucis: Elevation, extension (fibular nerve) |  |       |   |       |   |       |   |
| Foot: Elevation, dorsiflexion. (fibular nerve) |  |       |   |       |   |       |   |

**Caption:** Medical Research Council - Grade 0 - No muscle activation; Grade 1 - Trace muscle activation, such as a twitch, without achieving full range of motion; Grade 2 - Muscle activation with gravity eliminated, achieving full range of motion; Grade 3 - Muscle activation against gravity, full range of motion; Grade 4 - Muscle activation against some resistance, full range of motion; Grade 5 - Muscle activation against examiner's full resistance, full range of motion

| Sensory testing |   |       |   |       |   |
|-----------------|---|-------|---|-------|---|
| 1 / /           |   | 2 / / |   | 3 / / |   |
| R               | L | R     | L | R     | L |
|                 |   |       |   |       |   |

**Caption:** Clawing: Mobile = M Rigid = R Wounds/ulcers: Reabsorption: Monofilaments: Standardized code

| WHO DG | EYE                                                                                                                                        |   |   |   |   |   | HAND |                                                 |            |   |   |   | FOOT |   |                    |   |                                                 |           |   |   |  |  |  |
|--------|--------------------------------------------------------------------------------------------------------------------------------------------|---|---|---|---|---|------|-------------------------------------------------|------------|---|---|---|------|---|--------------------|---|-------------------------------------------------|-----------|---|---|--|--|--|
|        | Signs and symptoms                                                                                                                         | 1 |   | 2 |   | 3 |      | Signs and symptoms                              | 1          |   | 2 |   | 3    |   | Signs and symptoms | 1 |                                                 | 2         |   | 3 |  |  |  |
|        |                                                                                                                                            | R | L | R | L | R | L    |                                                 | R          | L | R | L | R    | L |                    | R | L                                               | R         | L |   |  |  |  |
| 0      | No eye problems due to leprosy; no evidence of visual loss                                                                                 |   |   |   |   |   |      | No anaesthesia, no visible deformity or damage  |            |   |   |   |      |   |                    |   | No anaesthesia, no visible deformity or damage  |           |   |   |  |  |  |
| 1      | Eye problem due to leprosy present, but vision not severely affected as a result (vision 6/60 or better; can count fingers at 6 metres)    |   |   |   |   |   |      | Anaesthesia, but no visible deformity or damage |            |   |   |   |      |   |                    |   | Anaesthesia, but no visible deformity or damage |           |   |   |  |  |  |
| 2      | Lagophthalmos and/or ectropion                                                                                                             |   |   |   |   |   |      | Loss of tissue, wounds ulcer                    |            |   |   |   |      |   |                    |   | Loss of tissue, wounds, ulcer                   |           |   |   |  |  |  |
|        | Trichiasis                                                                                                                                 |   |   |   |   |   |      | Claw hand                                       |            |   |   |   |      |   |                    |   | Claw toe                                        |           |   |   |  |  |  |
|        | Corneal opacity                                                                                                                            |   |   |   |   |   |      | Absorption                                      |            |   |   |   |      |   |                    |   | Absorption and/or contracture                   |           |   |   |  |  |  |
|        | Severe visual impairment (vision worse than 6/60; inability to count fingers at 6 metres), lagophthalmos, iridocyclitis, corneal opacities |   |   |   |   |   |      |                                                 | Wrist drop |   |   |   |      |   |                    |   |                                                 | Foot drop |   |   |  |  |  |
